# Supplementary material for: A mass spectrometric and quantum chemical study of the vaporisation of lead monoxide in a flow of gaseous arsenic and antimony trioxides
Source: Royal Society of Chemistry journal article supplement (doi:10.1039/c3dt53202j), 2014-01-01
Supplement: c3dt53202j1.pdf [file c3dt53202j1.pdf]

## Supplementary.

**Table 15.** Total energies of the molecular ions in the geometries of the neutral molecule.

| Molecular ion                                                   | $E_{\text{tot}}$ (a.u.) |
|-----------------------------------------------------------------|-------------------------|
| PbO <sup>+</sup>                                                | -267.940878             |
| Pb <sub>2</sub> O <sub>2</sub> <sup>+</sup>                     | -536.381295             |
| As <sub>4</sub> O <sub>6</sub> <sup>+</sup>                     | -9396.109026            |
| Sb <sub>4</sub> O <sub>6</sub> <sup>+</sup>                     | -1413.122828            |
| AsO <sup>+</sup>                                                | -2311.074637            |
| PbAs <sub>2</sub> O <sub>4</sub> <sup>+</sup>                   | -4966.247324            |
| PbAsO <sub>2</sub> <sup>+</sup>                                 | -2579.542825            |
| Pb <sub>3</sub> As <sub>2</sub> O <sub>6</sub> (I) <sup>+</sup> | -5503.083897            |
| PbSb <sub>2</sub> O <sub>4</sub> <sup>+</sup>                   | -974.753730             |
