# Supplementary material for: A mass spectrometric and quantum chemical study of the vaporisation of lead monoxide in a flow of gaseous arsenic and antimony trioxides
Source: Royal Society of Chemistry journal article supplement (doi:10.1039/c3dt53202j), 2014-01-01
Supplement: c3dt53202j2.pdf [file c3dt53202j2.pdf]

## Supplementary.

**Table 15.** Total energies of the molecular ions in the geometries of the neutral molecule.

| Molecular ion                                  | $E_{\text{tot}}$ (a.u.) |
|------------------------------------------------|-------------------------|
| $\text{PbO}^+$                                 | -267.940878             |
| $\text{Pb}_2\text{O}_2^+$                      | -536.381295             |
| $\text{As}_4\text{O}_6^+$                      | -9396.109026            |
| $\text{Sb}_4\text{O}_6^+$                      | -1413.122828            |
| $\text{AsO}^+$                                 | -2311.074637            |
| $\text{PbAs}_2\text{O}_4^+$                    | -4966.247324            |
| $\text{PbAsO}_2^+$                             | -2579.542825            |
| $\text{Pb}_3\text{As}_2\text{O}_6(\text{I})^+$ | -5503.083897            |
| $\text{PbSb}_2\text{O}_4^+$                    | -974.753730             |
